# Supplementary material for: Association of Ambient Temperature and Absolute Humidity with the Effective Reproduction Number of COVID-19 in Japan
Source: MDPI journal article supplement (doi:10.3390/pathogens12111307), 2023-11-01
Supplement: s1 [file s1]

**Supplementary Materials for: Association of Ambient Temperature and Absolute Humidity with the Effective Reproduction Number of COVID-19 in Japan**

**Authors:**

Keita Wagatsuma<sup>1,2</sup>

**Affiliations:**

<sup>1</sup>Division of International Health (Public Health), Graduate School of Medical and Dental Sciences, Niigata University, Niigata, Japan

<sup>2</sup>Japan Society for the Promotion of Science, Tokyo, Japan

**Corresponding author:**

Keita Wagatsuma

Division of International Health (Public Health)

Graduate School of Medical and Dental Sciences, Niigata University

1-757 Asahimachi-dori, Chuo-ku, Niigata City, Niigata 951-8510, Japan

Tel: +81-25-227-2129; Fax +81-25-227-0765

E-mail: waga@med.niigata-u.ac.jp

# Supplementary figure legends

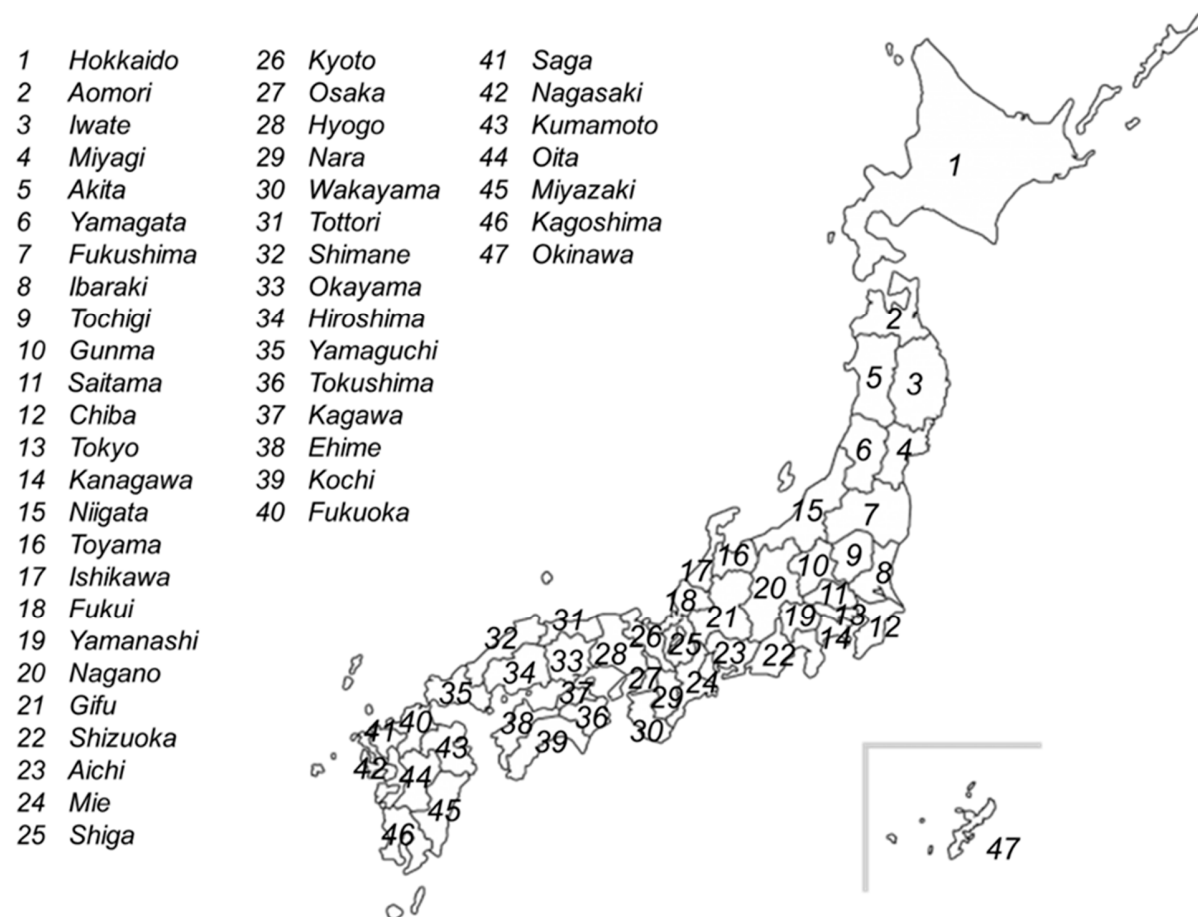

**Figure S1.** The geographic distribution of the 47 Japanese prefectures and their locations. Japan is located on latitudes and longitudes from approximately 26°N to 43°N and 127°E to 141°E, respectively, in the Western Pacific Region, and comprises a total of 47 prefectures, listed

from north to south as follows: Hokkaido, Aomori, Iwate, Miyagi, Akita, Yamagata, Fukushima, Ibaraki, Tochigi, Gunma, Saitama, Chiba, Tokyo, Kanagawa, Niigata, Toyama, Ishikawa, Fukui, Yamanashi, Nagano, Gifu, Shizuoka, Aichi, Mie, Shiga, Kyoto, Osaka, Hyogo, Nara, Wakayama, Tottori, Shimane, Okayama, Hiroshima, Yamaguchi, Tokushima, Kagawa, Ehime, Kochi, Fukuoka, Saga, Nagasaki, Kumamoto, Oita, Miyazaki, Kagoshima, and Okinawa.

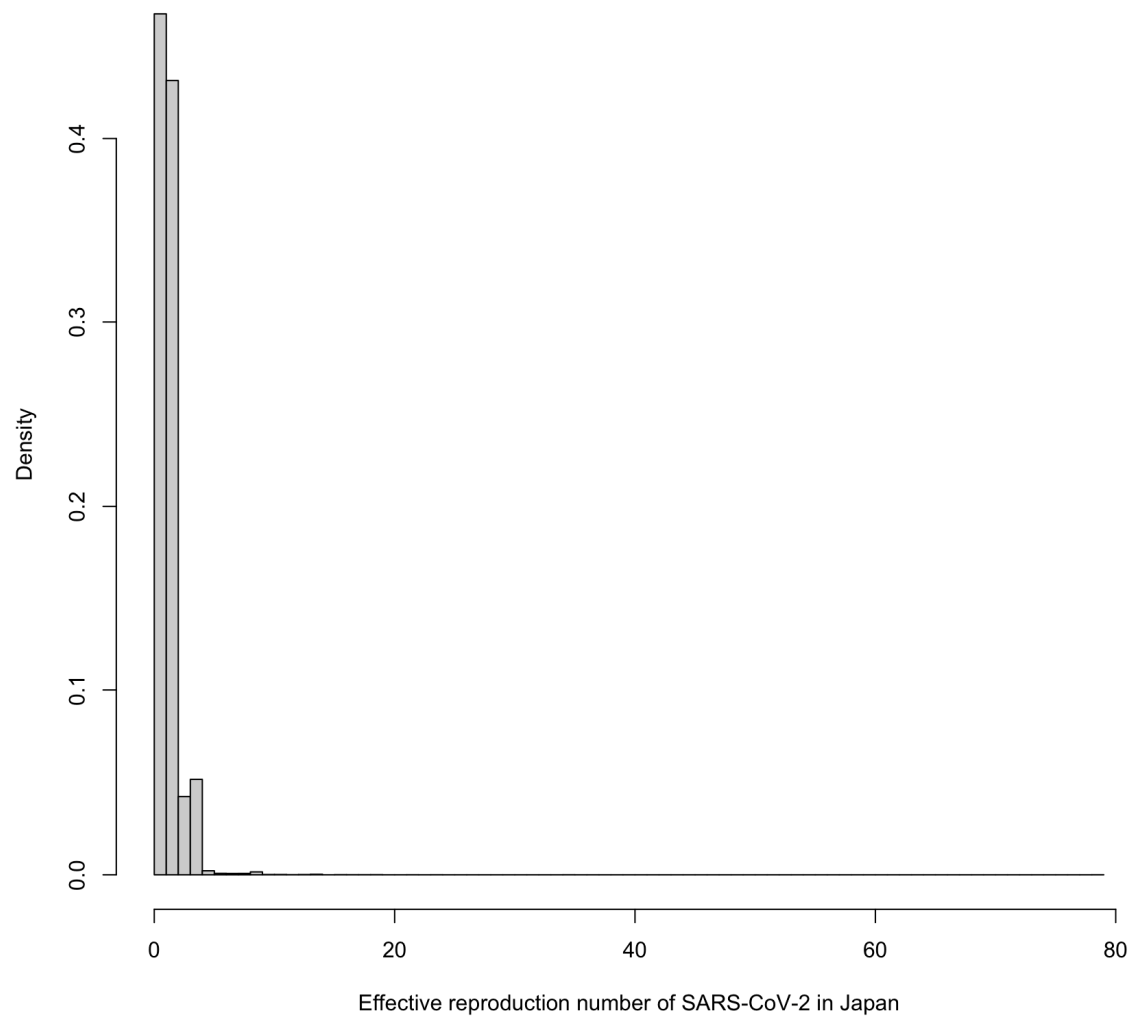

**Figure S2.** Probability distribution of the daily time-varying effective reproductive numbers in Japan across all the included prefectures and days. The mean daily time-varying effective reproduction number in Japan across all the included prefectures and days was 1.24. These observational data do not follow a normal distribution (Shapiro–Wilk test,  $P < 0.001$ ).

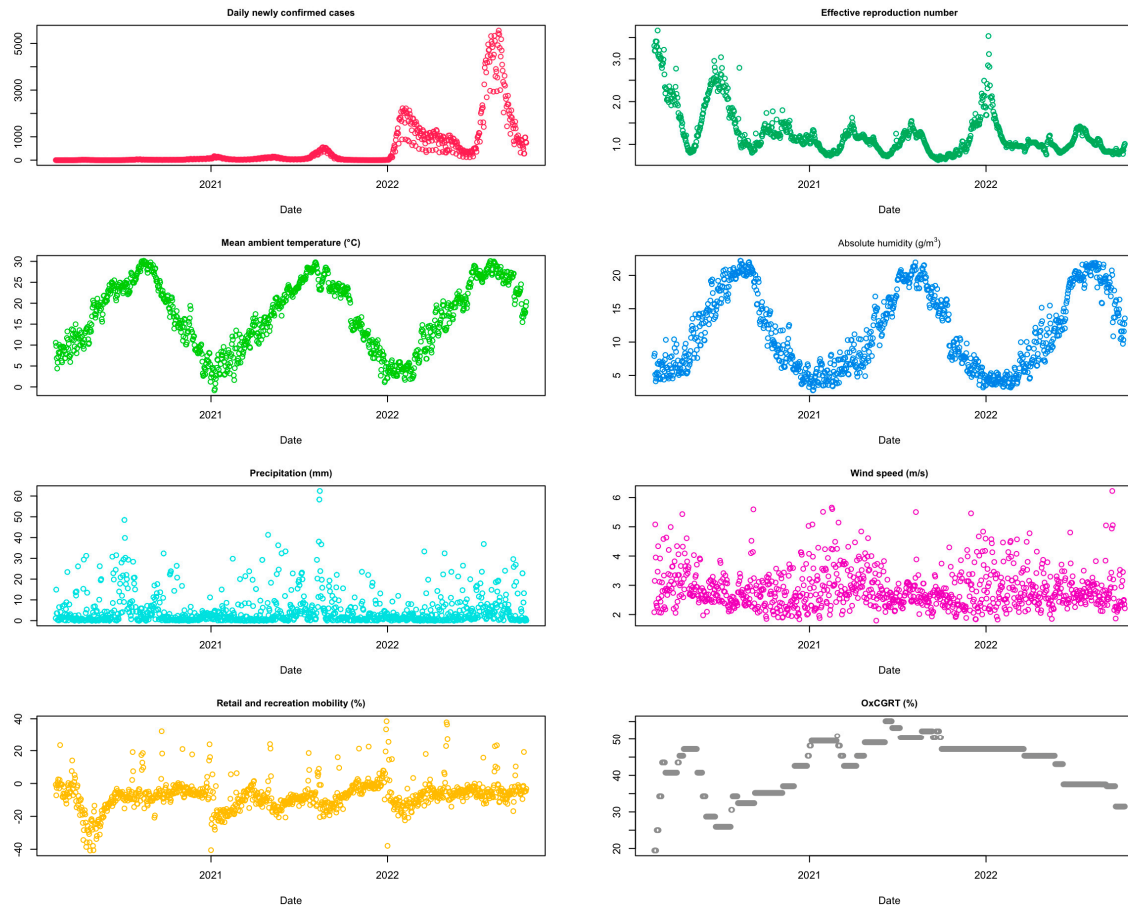

**Figure S3.** Temporal mean trends of the number of daily newly confirmed COVID-19 cases, effective reproduction numbers, meteorological variables, mobility patterns, and OxCGRt across all 47 Japanese prefectures and days. Abbreviations: OxCGRt: Oxford Coronavirus Government Response Tracer.



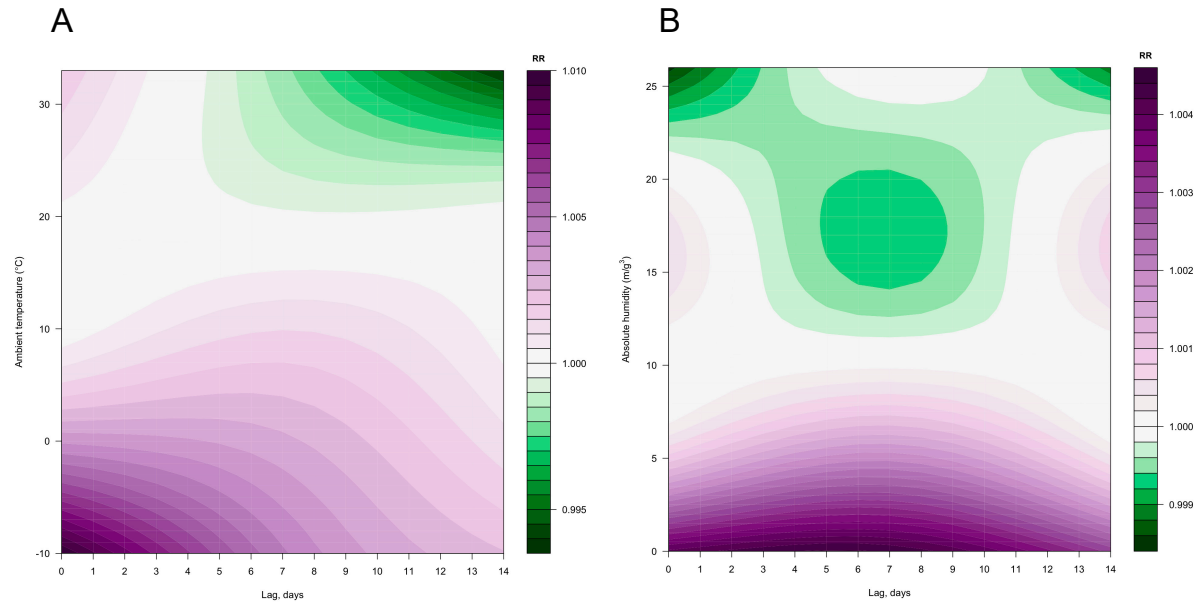

**Figure S4.** Lag-response relationship for hydrometeorological hazard scenarios. Contour plot of the association between the (A) daily mean ambient temperature (°C) and risk of estimated time-varying effective reproduction number ( $R_t$ ) over a 14-day lag, relative to the overall median of the mean ambient temperature (17.8°C), and (B) daily absolute humidity (m/g<sup>3</sup>) and risk of estimated time-varying  $R_t$  over a 14-day lag, relative to the overall median of absolute humidity (10.6 m/g<sup>3</sup>). The deeper the shade of purple, the greater the increase in the relative risks (RR) of the estimated time-varying  $R_t$  as compared with the overall mean ambient temperature. The deeper the shade of green, the greater the decrease in the RR of estimated time-varying  $R_t$  as compared with the overall mean ambient temperature.



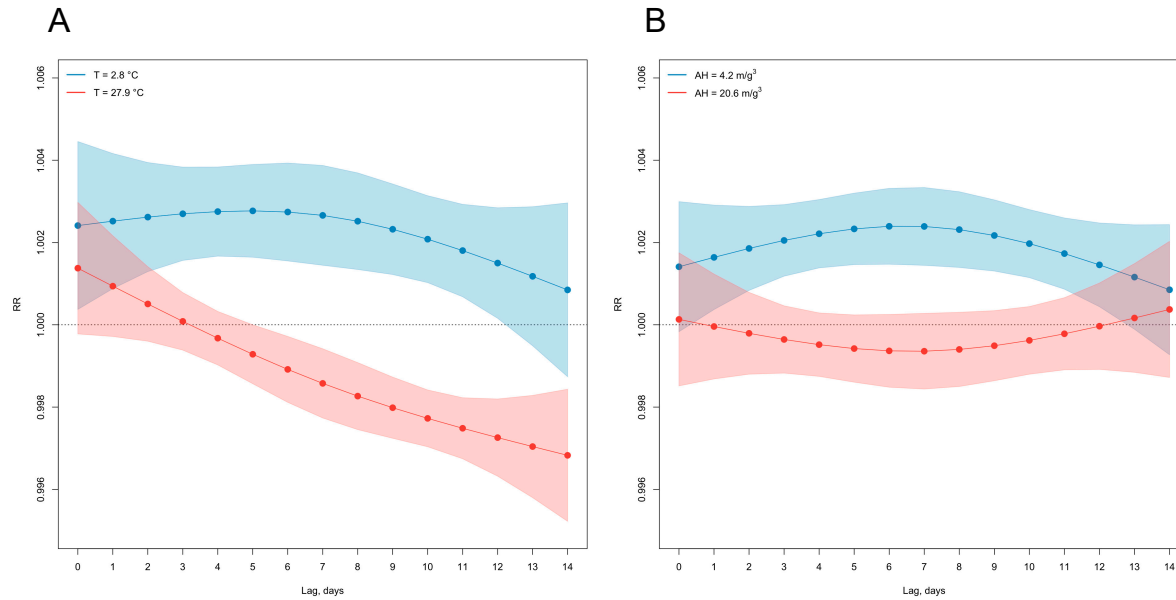

**Figure S5.** Lag–response relationship for hydrometeorological hazard scenarios. Lag–response association for scenarios of **(A)** mean ambient temperature: exceptionally cold (5.1°C; 10<sup>th</sup> percentile) and exceptionally hot (27.9°C; 90<sup>th</sup> percentile) conditions relative to the baseline (17.8°C; 50<sup>th</sup> percentile) and **(B)** absolute humidity: 4.2 m/g<sup>3</sup> (10<sup>th</sup> percentile) and 20.6 m/g<sup>3</sup> (90<sup>th</sup> percentile) relative to the baseline (10.6 m/g<sup>3</sup>; 50<sup>th</sup> percentile), at lags between 0 and 14 days. the shaded areas represent 95% confidence intervals (CI). Abbreviations: AH, absolute humidity; RR, relative risk; T, mean ambient temperature.

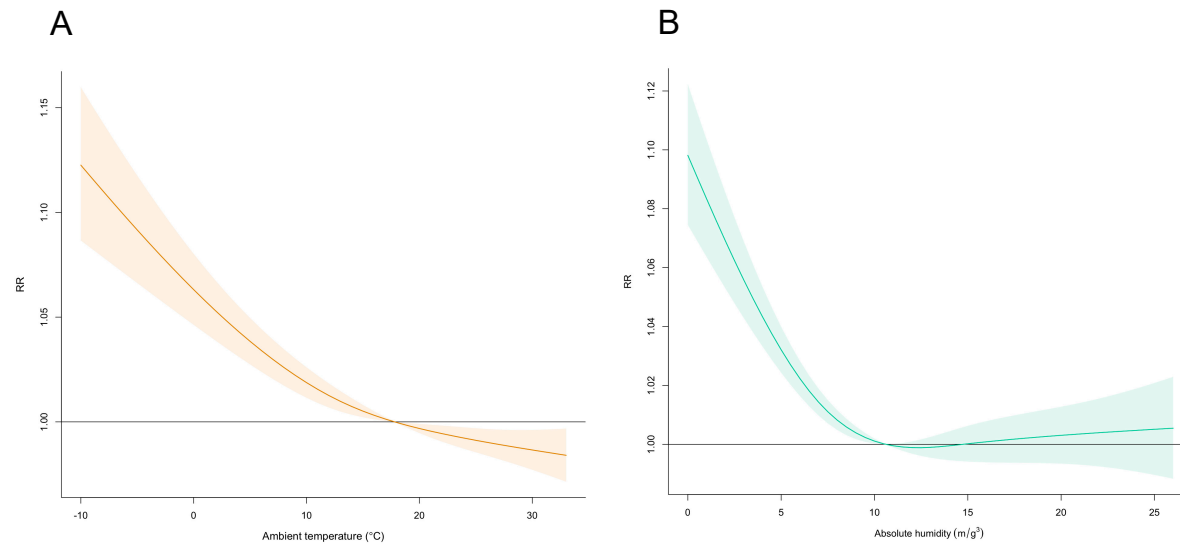

**Figure S6.** Cumulative exposure–response association for the mean ambient temperature and absolute humidity. Overall exposure–response association across all lags (0–14 days) between the time-varying effective reproduction number ( $R_t$ ) of SARS-CoV-2 and **(A)** the mean ambient temperature (°C) relative to the overall mean minimum ambient temperature of 17.8°C and **(B)** absolute humidity (m/g<sup>3</sup>) relative to the overall mean maximum ambient temperature of 10.6 m/g<sup>3</sup>. The shaded areas represent the 95% confidence intervals. In this sensitivity analysis, a natural cubic spline of time was set up with different degrees of freedom (four degrees of freedom per year).

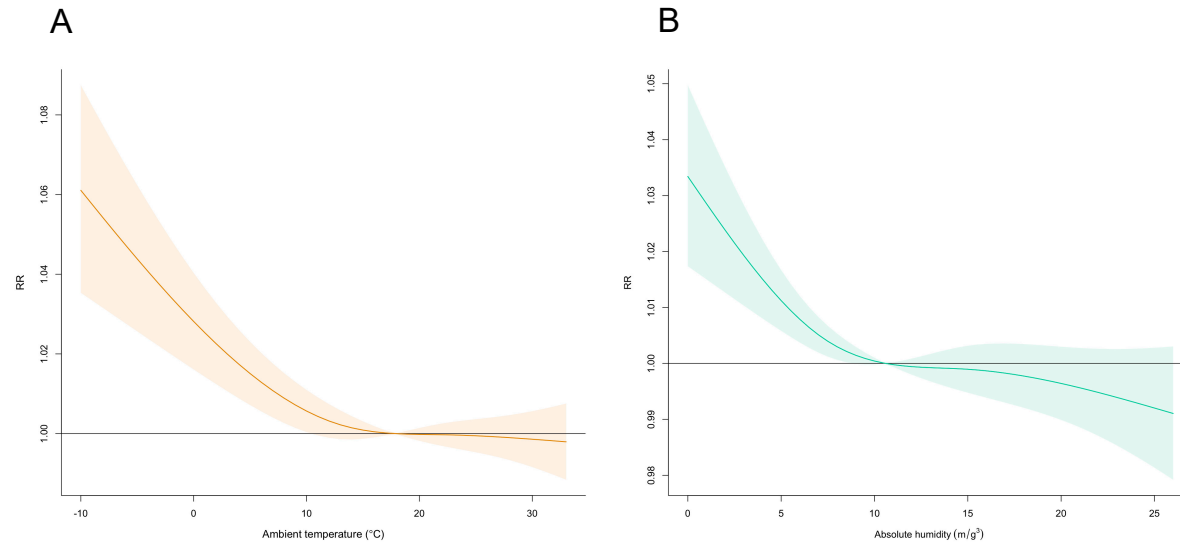

**Figure S7.** Cumulative exposure–response association for the mean ambient temperature and absolute humidity. The overall exposure–response association across all lags (0–7 days) between the time-varying effective reproduction number ( $R_t$ ) of SARS-CoV-2 and the (A) mean ambient temperature (°C) relative to the overall mean minimum ambient temperature of 17.8°C and (B) absolute humidity ( $\text{m/g}^3$ ) relative to the overall mean maximum temperature of 10.6  $\text{m/g}^3$ . The shaded areas represent the 95% confidence intervals. In this sensitivity analysis, the lagged structure of the cross-basis function was changed from 0–14 to 0–7 days.

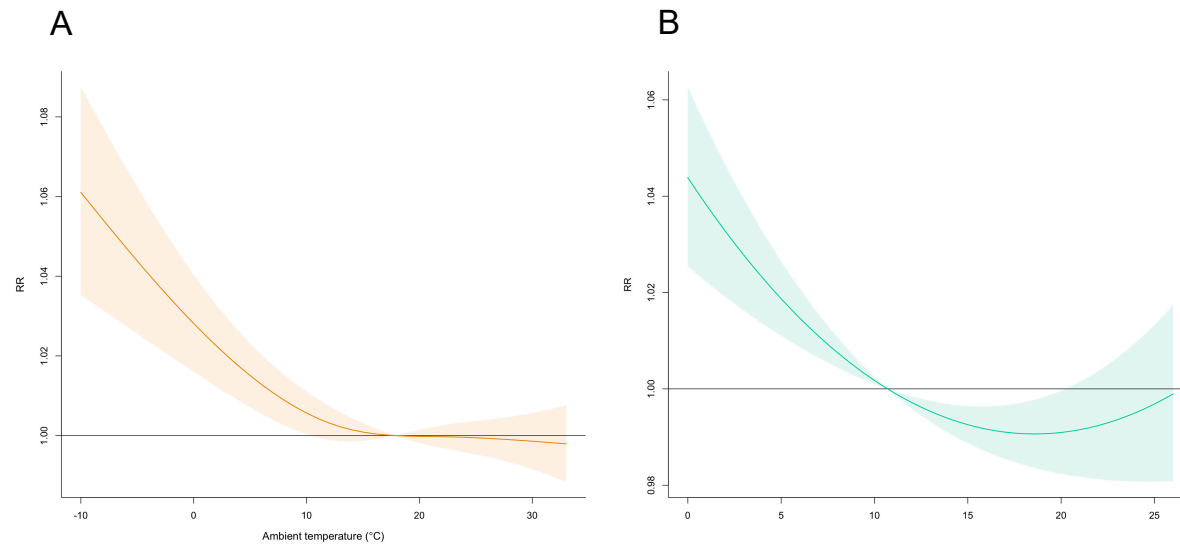

**Figure S8.** Cumulative exposure–response association for the mean ambient temperature and absolute humidity. The overall exposure–response association across all lags (0–14 days) between the time-varying effective reproduction number ( $R_t$ ) of SARS-CoV-2 and **(A)** the mean ambient temperature (°C) relative to the overall mean minimum temperature of 17.8°C and **(B)** absolute humidity (m/g<sup>3</sup>) relative to the overall mean maximum ambient temperature of 10.6 m/g<sup>3</sup>. The shaded areas represent the 95% confidence intervals. In this sensitivity analysis, the functional form of spline for the exposure–response curve ranges from a natural cubic spline with 3 degrees of freedom (df) to a second-degree polynomial. The lag–response curve was remodeled with a natural cubic spline with intercept and two equally spaced knots on a log scale.

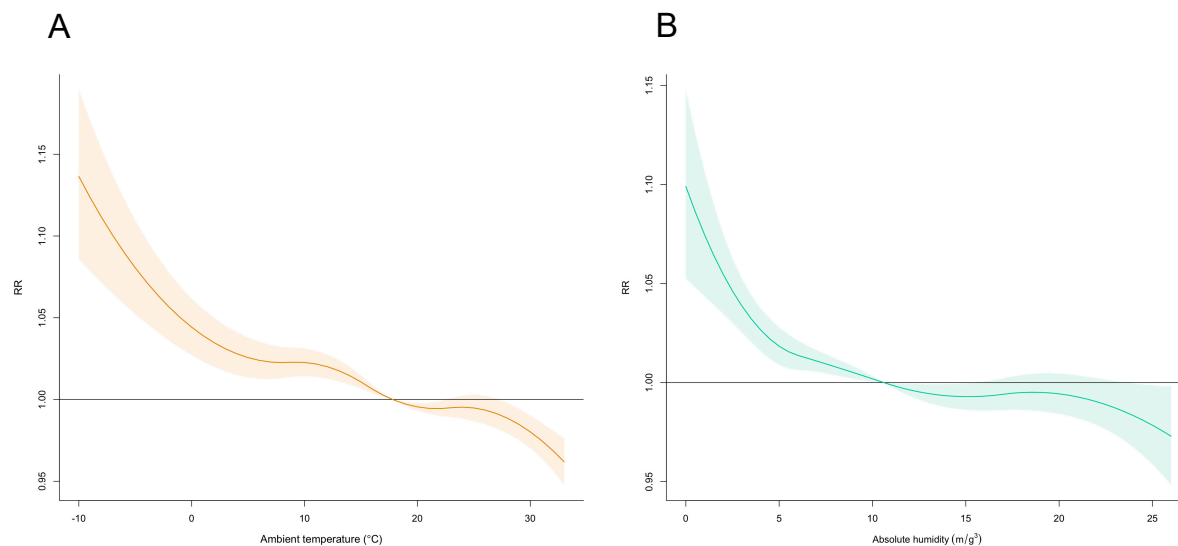

**Figure S9.** Cumulative exposure–response association for the mean ambient temperature and absolute humidity. The overall exposure–response association across all lags (0–14 days) between the time-varying effective reproduction number ( $R_t$ ) of SARS-CoV-2 and (A) the mean ambient temperature (°C) relative to the overall mean minimum ambient temperature of 17.8°C and (B) absolute humidity ( $\text{m/g}^3$ ) relative to the overall mean maximum ambient temperature of 10.6  $\text{m/g}^3$ . The shaded areas represent the 95% confidence intervals. In this sensitivity analysis, the functional form of spline for the exposure–response curve extends from a natural cubic spline with 3 degrees of freedom (df) to a quadratic B-spline with three internal knots, placed at the 25<sup>th</sup>, 50<sup>th</sup>, and 75<sup>th</sup> percentiles of the mean ambient temperature and absolute humidity. The lag–response curve was remodeled with a natural cubic spline with intercept and two equally spaced knots on a log scale.

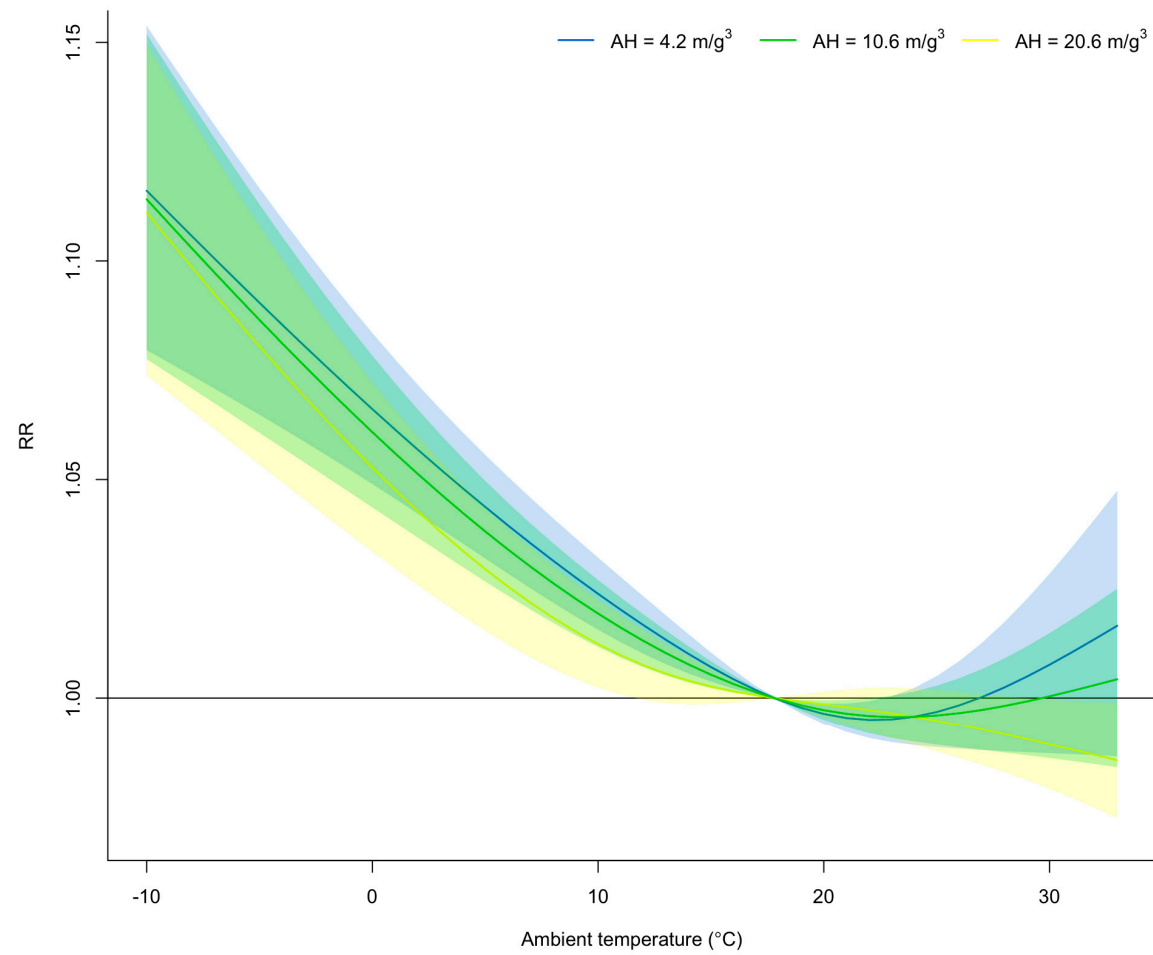

**Figure S10.** Overall exposure–response relationship between the mean ambient temperature and time-varying transmissibility of SARS-CoV-2 stratified by different levels of absolute humidity. The pooled relative risk (RR) was centered at the overall median of mean ambient temperature (17.8°C; 50<sup>th</sup> percentile); high absolute humidity (AH) group (20.6 m/g<sup>3</sup>; 90<sup>th</sup> percentile), medium absolute humidity group (10.6 m/g<sup>3</sup>; 50<sup>th</sup> percentile), and low absolute humidity group (4.2 m/g<sup>3</sup>; 10<sup>th</sup> percentile). The shaded areas on the curves are the 95% confidence interval. In this sensitivity analysis, a natural cubic spline of time was set up with different degrees of freedom (four degrees of freedom per year).

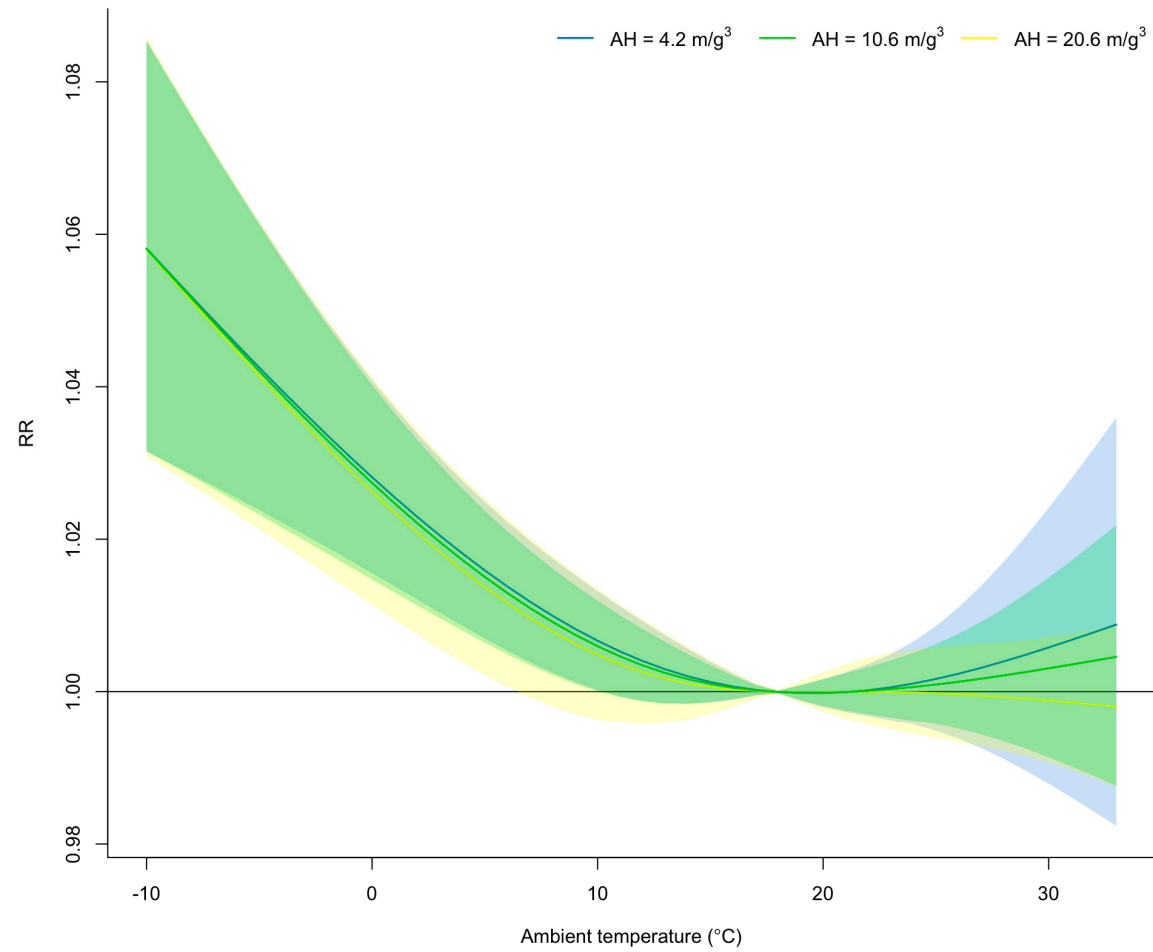

**Figure S11.** Overall exposure–response relationship between the mean ambient temperature and the time-varying transmissibility of SARS-CoV-2 stratified by different levels of absolute humidity. The pooled relative risk (RR) was centered at the overall median of mean ambient



temperature (17.8°C; 50<sup>th</sup> percentile); high absolute humidity (AH) group (20.6 m/g<sup>3</sup>; 90<sup>th</sup> percentile;), medium absolute humidity group (10.6 m/g<sup>3</sup>; 50<sup>th</sup> percentile), and low absolute humidity group (4.2 m/g<sup>3</sup>; 10<sup>th</sup> percentile). The shaded areas on the curves are the 95% confidence interval. In this sensitivity analysis, the lagged structure of the cross-basis function was changed from 0–14 to 0–7 days.

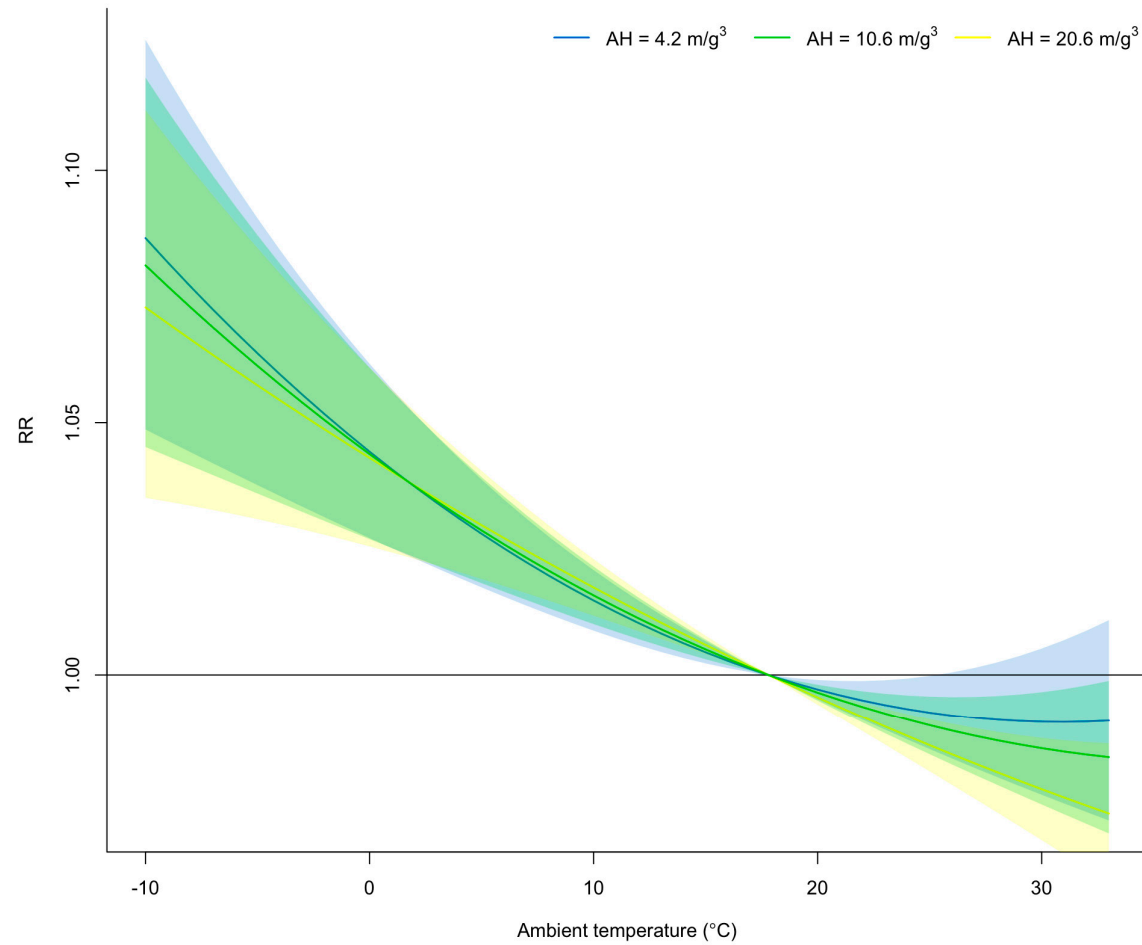

**Figure S12.** Overall exposure–response relationship between the mean ambient temperature and the time-varying transmissibility of SARS-CoV-2 stratified by different levels of absolute humidity. The pooled relative risk (RR) was centered at the overall median of mean ambient

temperature (17.8°C; 50<sup>th</sup> percentile); high absolute humidity (AH) group (20.6 m/g<sup>3</sup>; 90<sup>th</sup> percentile;), medium absolute humidity group (10.6 m/g<sup>3</sup>; 50<sup>th</sup> percentile), and low absolute humidity group (4.2 m/g<sup>3</sup>; 10<sup>th</sup> percentile). The shaded areas on the curves are the 95% confidence intervals. In this sensitivity analysis, the functional form of the spline for the exposure–response curve extended from a natural cubic spline with 3 degrees of freedom (df) to a second-degree polynomial. The lag–response curve was remodeled with a natural cubic spline with intercept and two equally spaced knots on a log scale.

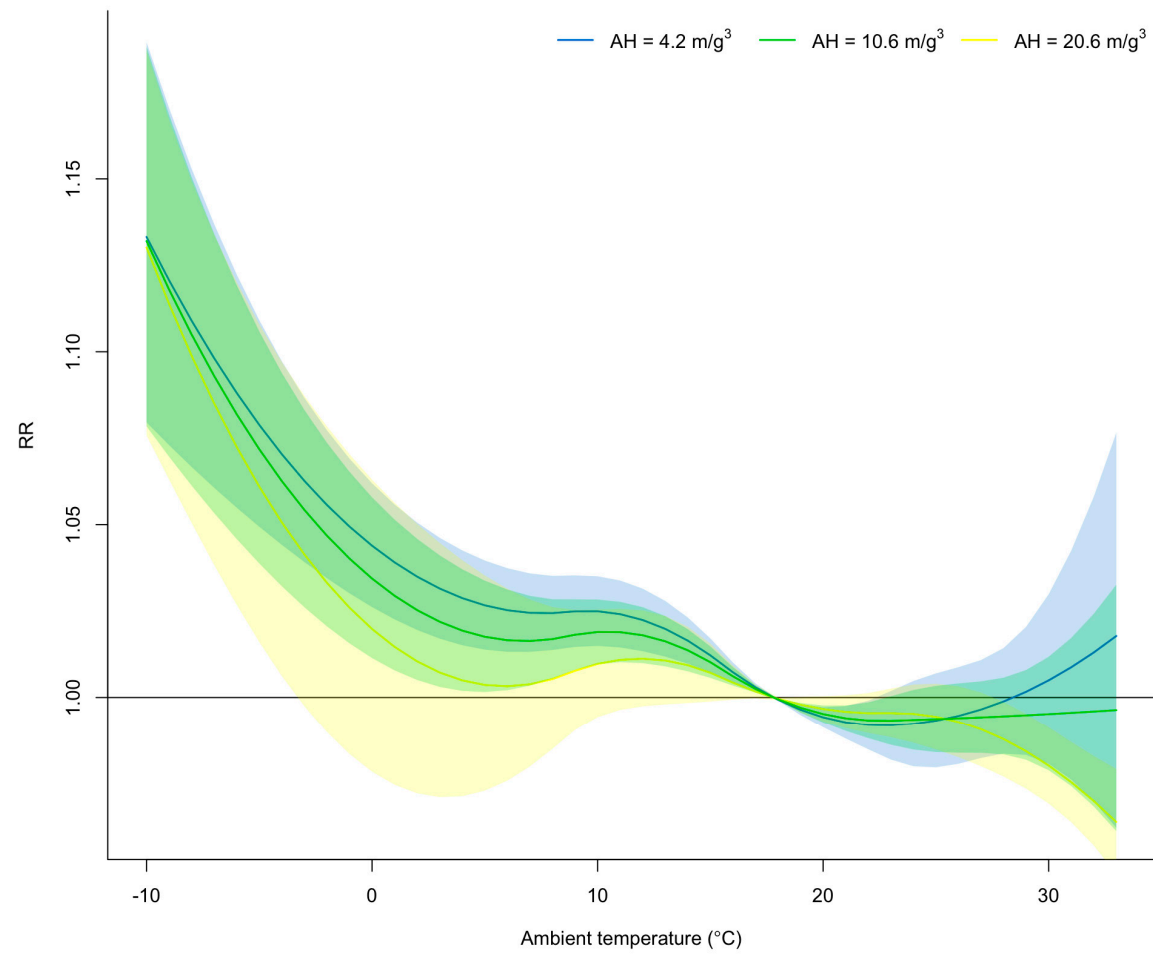

**Figure S13.** Overall exposure–response relationship between the mean ambient temperature and the time-varying transmissibility of SARS-CoV-2 stratified by different levels of absolute humidity. The pooled relative risk (RR) was centered at the overall median of the mean ambient temperature (17.8°C; 50<sup>th</sup> percentile) with the high absolute humidity (AH) group (20.6 m/g<sup>3</sup>; 90<sup>th</sup> percentile), medium absolute humidity group (10.6 m/g<sup>3</sup>; 50<sup>th</sup> percentile), and low absolute humidity group (4.2 m/g<sup>3</sup>; 10<sup>th</sup> percentile). The shaded areas on the curves are the 95% confidence interval. In this sensitivity analysis, the functional form of spline for the exposure–response curve varied from a natural cubic spline with 3 degrees of freedom (df) to a quadratic B-spline with three internal knots, placed at the 25<sup>th</sup>, 50<sup>th</sup>, and 75<sup>th</sup> percentiles of the mean ambient temperature and absolute humidity. The lag–response curve was remodeled with a natural cubic spline with intercept and two equally spaced knots on a log scale.

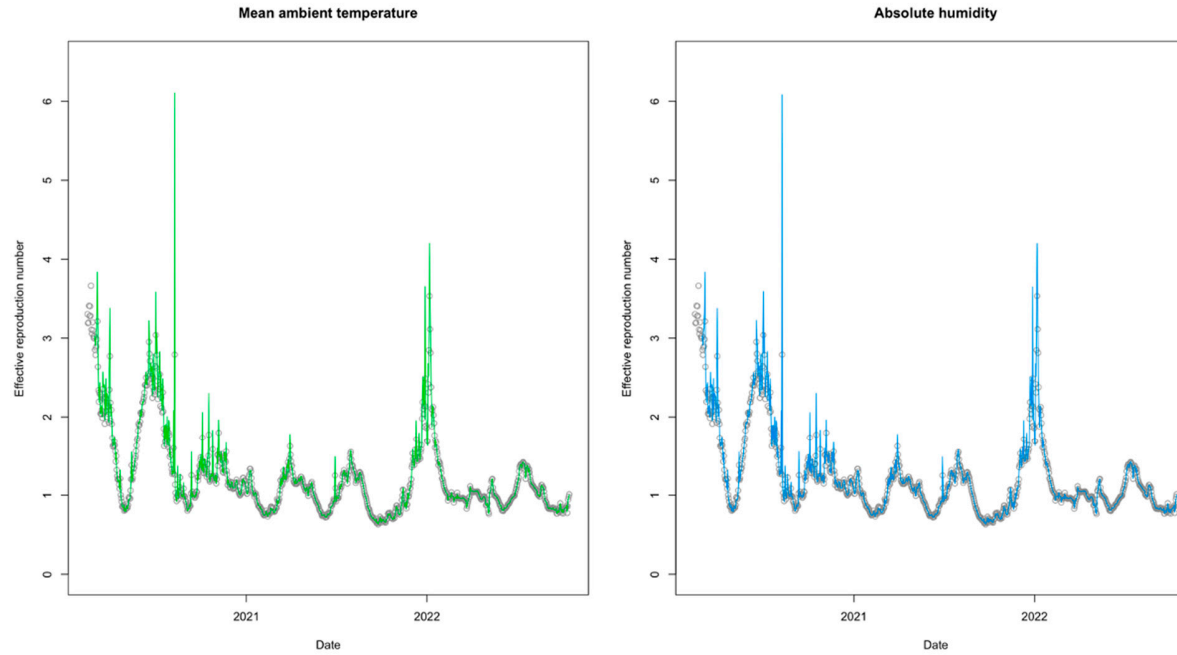

**Figure S14.** Model predictions of the time-varying effective reproduction numbers in Japan. The gray dots represent the observed temporal mean trends of the time-varying effective reproduction numbers ( $R_t$ ) of SARS-CoV-2 across all 47 Japanese prefectures. The green and blue solid lines represent the time-varying  $R_t$  predicted (in-sample) from the main model including the cross-basis functions for (A) mean ambient temperature and (B) absolute humidity, respectively. Pair-wise Spearman's rank-order linear correlation coefficients statistics showed that the temporal mean trends of the time-varying  $R_t$  strongly and positively correlated with time-varying  $R_t$  predicted from the main model of mean ambient temperature ( $\rho = 0.99$ ) and absolute humidity ( $\rho = 0.99$ ), respectively.

**Table S1.** Pairwise Spearman's rank-order linear correlation matrix-based assessments of multicollinearity among daily meteorological variables, mobility patterns, and vaccinations across all 47 Japanese prefectures and days.

| Potential drivers                        | 1        | 2        | 3        | 4        | 5        | 6        | 7    |
|------------------------------------------|----------|----------|----------|----------|----------|----------|------|
| 1. Effective reproductive number         | 1.00     |          |          |          |          |          |      |
| 2. Mean ambient temperature (°C)         | −0.08*** | 1.00     |          |          |          |          |      |
| 3. Absolute humidity (m/g <sup>3</sup> ) | −0.06*** | 0.95***  | 1.00     |          |          |          |      |
| 4. Precipitation (mm)                    | 0.03***  | 0.04***  | 0.22***  | 1.00     |          |          |      |
| 5. Wind speed (m/s)                      | 0.01     | −0.04*** | −0.10*** | 0.03***  | 1.00     |          |      |
| 6. Retail and recreation mobility (%)    | 0.11***  | −0.01**  | −0.01*** | −0.13*** | −0.07*** | 1.00     |      |
| 7. OxCVRT (%)                            | −0.23*** | −0.22*** | −0.23*** | −0.02*** | 0.03***  | −0.23*** | 1.00 |

Abbreviations: OxCVRT: Oxford Coronavirus Government Response Tracer. Notes: Significant predictors in the statistical model are described by \* $P < 0.05$ ; \*\* $P < 0.01$ ; \*\*\* $P < 0.001$ .

**Table S2.** Estimated relative risks of the overall exposure–response relationship between the mean ambient temperature and the time-varying transmissibility of SARS-CoV-2 by different levels of absolute humidity over a lag of 14 days.

| Subgroups | Low mean ambient temperature (°C), RR (95% CI) |                                     | High mean ambient temperature (°C), RR (95% CI) |                                      |
|-----------|------------------------------------------------|-------------------------------------|-------------------------------------------------|--------------------------------------|
|           | 2.8°C (5 <sup>th</sup> percentile)             | 5.1°C (10 <sup>th</sup> percentile) | 27.9°C (90 <sup>th</sup> percentile)            | 29.9°C (95 <sup>th</sup> percentile) |
| Low AH    | 1.039 (1.025–1.053)                            | 1.032 (1.020–1.044)                 | 0.995 (0.981–1.010)                             | 0.997 (0.977–1.017)                  |
| Medium AH | 1.034 (1.020–1.048)                            | 1.028 (1.016–1.039)                 | 0.990 (0.980–1.001)                             | 0.990 (0.976–1.004)                  |
| High AH   | 1.027 (1.011–1.044)                            | 1.021 (1.007–1.035)                 | 0.983 (0.975–0.992)                             | 0.979 (0.969–0.989)                  |

Abbreviations: AH, absolute humidity; CI, confidence interval; RR, relative risk; SARS-CoV-2, severe acute respiratory syndrome coronavirus 2. Notes: 2.8°C, 5.1°C, 27.9°C, and 29.9°C correspond to the 5<sup>th</sup>, 10<sup>th</sup>, 90<sup>th</sup>, and 95<sup>th</sup> percentiles of mean ambient temperature, respectively. The pooled RR was centered at the overall median of the mean ambient temperature (17.8°C; 50<sup>th</sup> percentile); high AH group: 20.6 m/g<sup>3</sup> (90<sup>th</sup> percentile); medium AH group: 10.6 m/g<sup>3</sup> (50<sup>th</sup> percentile); and low AH group: 4.2 m/g<sup>3</sup> (10<sup>th</sup> percentile).
